# Supplementary material for: The transcriptome of the bowhead whale Balaena mysticetus reveals adaptations of the longest-lived mammal
Source: PubMed Central journal article supplement (PMC4247388; doi:10.18632/aging.100699), 2014-11-03
Supplement: aging-06-879-s001.pdf [file aging-06-879-s001.pdf]

## SUPPLEMENTAL DATA

**Supplemental Table 1. Summary of bowhead whale tissues.** Animals were captured by Alaskan Iñupiaq Eskimos during the 2010 subsistence hunt in Barrow, Alaska.

| Whale ID | Date       | Length (m) | Sex | Sequenced tissue(s)  |
|----------|------------|------------|-----|----------------------|
| 10B15    | 7 Oct 2010 | 12.5       | F   | kidney               |
| 10B16    | 7 Oct 2010 | 7.9        | M   | kidney, liver, heart |
| 10B18    | 8 Oct 2010 | 9.1        | F   | kidney, liver        |
| 10B21    | 9 Oct 2010 | 11.5       | M   | kidney, liver        |

**Supplemental Table 2. Trinity *de novo* assembly statistics.** N50 is the shortest sequence (in bp) in a set of sequences that together cover 50% of the total length of all assembled sequences.

| KIDNEY             |                       |                       |            |
|--------------------|-----------------------|-----------------------|------------|
| Species            | Total assembled bases | Average contig length | Contig N50 |
| bowhead whale      | 341,207,982           | 827.0                 | 1,757      |
| Brandt's bat       | 111,480,415           | 659.1                 | 1,184      |
| cow                | 222,232,281           | 687.1                 | 1,283      |
| minke whale        | 125,846,350           | 830.5                 | 1,845      |
| mouse              | 202,736,316           | 551.7                 | 711        |
| naked mole rat     | 115,089,648           | 602.5                 | 883        |
| rat                | 198,547,815           | 582.2                 | 838        |
| rhesus             | 244,323,096           | 548.3                 | 688        |
| Chinese tree shrew | 73,017,424            | 677.6                 | 1,186      |
| LIVER              |                       |                       |            |
| Species            | Total assembled bases | Average contig length | Contig N50 |
| bowhead whale      | 267,997,432           | 851.2                 | 1,836      |
| Brandt's bat       | 75,390,009            | 623.2                 | 978        |

|                    |                              |                              |                   |
|--------------------|------------------------------|------------------------------|-------------------|
| cow                | 195,515,095                  | 706.8                        | 1,290             |
| minke whale        | 96,531,396                   | 727.1                        | 1,376             |
| mouse              | 166,651,410                  | 929.0                        | 929               |
| naked mole rat     | 109,558,846                  | 579.3                        | 802               |
| rat                | 163,138,099                  | 637.8                        | 1,009             |
| rhesus             | 225,165,355                  | 563.6                        | 763               |
| Chinese tree shrew | 51,457,297                   | 728.1                        | 1,234             |
| yak                | 61,713,325                   | 608.5                        | 859               |
| <b>HEART</b>       |                              |                              |                   |
| <b>Species</b>     | <b>Total assembled bases</b> | <b>Average contig length</b> | <b>Contig N50</b> |
| bowhead whale      | 49,542,996                   | 635.4                        | 1,006             |
| cow                | 71,474,262                   | 846.4                        | 1,776             |
| minke whale        | 89,129,137                   | 855.8                        | 1,863             |
| mouse              | 14,454,056                   | 528.0                        | 654               |
| rat                | 123,905,647                  | 603.7                        | 962               |
| rhesus             | 15,679,757                   | 517.3                        | 623               |
| Chinese tree shrew | 41,680,276                   | 672.7                        | 1,000             |
| yak                | 73,020,901                   | 610.3                        | 866               |

**Supplemental Table 3. Genes differentially expressed in the Brandt's bat liver compared to other mammals.**

For each gene, gene counts were normalized across all replicates. We used an absolute value of log<sub>2</sub> Ratio  $\geq 2$ , a Benjamini-Hochberg corrected P-value  $\leq 0.05$ , and a B-value of at least 2.945 (representing a 95% probability that a gene is differentially expressed) as the threshold to judge the significance of gene expression difference between the Brandt's bat and other mammals. A negative fold change denotes a higher gene expression compared to the other mammals examined, and vice versa.

| Gene symbol (mouse)   | Ensembl transcript ID | Name                                                                                         | logFC | P-value  | BH-adj. P-value | B-value |
|-----------------------|-----------------------|----------------------------------------------------------------------------------------------|-------|----------|-----------------|---------|
| <i>0610037 L13Rik</i> | ENSMUST00000125107    | RIKEN cDNA 0610037L13 gene                                                                   | 3.56  | 1.99E-06 | 4.31E-04        | 5.05    |
| <i>Adh1</i>           | ENSMUST00000004232    | alcohol dehydrogenase 1 (class I)                                                            | 6.81  | 1.38E-10 | 7.51E-07        | 13.85   |
| <i>Aff1</i>           | ENSMUST00000031256    | AF4/FMR2 family, member 1                                                                    | -3.37 | 3.19E-06 | 5.03E-04        | 4.61    |
| <i>Agpat6</i>         | ENSMUST00000167004    | 1-acylglycerol-3-phosphate O-acyltransferase 6 (lysophosphatidic acid acyltransferase, zeta) | 4.80  | 4.17E-06 | 5.61E-04        | 4.35    |
| <i>Aldh2</i>          | ENSMUST00000031411    | aldehyde dehydrogenase 2, mitochondrial                                                      | 3.06  | 2.60E-07 | 1.05E-04        | 7.00    |
| <i>Arhgef3</i>        | ENSMUST00000049206    | Rho guanine nucleotide exchange factor (GEF) 3                                               | -4.90 | 1.98E-07 | 8.59E-05        | 7.25    |
| <i>Ate1</i>           | ENSMUST00000033139    | arginyltransferase 1                                                                         | -2.35 | 1.12E-05 | 1.01E-03        | 3.41    |
| <i>Bin1</i>           | ENSMUST00000025239    | bridging integrator 1                                                                        | 3.23  | 1.28E-06 | 3.51E-04        | 5.46    |
| <i>Cbr4</i>           | ENSMUST00000034058    | carbonyl reductase 4                                                                         | 3.49  | 1.76E-05 | 1.36E-03        | 3.00    |
| <i>Cdc42bp a</i>      | ENSMUST00000111117    | CDC42 binding protein kinase alpha                                                           | -4.07 | 1.37E-08 | 1.12E-05        | 9.76    |
| <i>Cog7</i>           | ENSMUST00000057576    | component of oligomeric golgi complex 7                                                      | -2.16 | 1.28E-05 | 1.08E-03        | 3.28    |
| <i>Cpn1</i>           | ENSMUST00000026210    | carboxypeptidase N, polypeptide 1                                                            | -3.82 | 1.24E-05 | 1.06E-03        | 3.31    |
| <i>Cpne3</i>          | ENSMUST00000029885    | copine III                                                                                   | -2.25 | 8.17E-06 | 8.39E-04        | 3.71    |
| <i>Creb1</i>          | ENSMUST00000049932    | cAMP responsive element binding protein 1                                                    | -2.38 | 2.68E-06 | 4.87E-04        | 4.77    |
| <i>Dcaf13</i>         | ENSMUST00000022909    | DDB1 and CUL4 associated factor 13                                                           | -3.79 | 4.81E-09 | 6.79E-06        | 10.74   |
| <i>Dym</i>            | ENSMUST00000039608    | dymeclin                                                                                     | -2.60 | 1.81E-06 | 4.25E-04        | 5.15    |
| <i>ErbB3</i>          | ENSMUST00000082059    | v-erb-b2 erythroblastic leukemia viral oncogene homolog 3                                    | 4.62  | 6.32E-08 | 3.96E-05        | 8.25    |

|                  |                    |                                                                                                                                      |       |          |          |       |
|------------------|--------------------|--------------------------------------------------------------------------------------------------------------------------------------|-------|----------|----------|-------|
|                  |                    | (avian)                                                                                                                              |       |          |          |       |
| <i>Etnk2</i>     | ENSMUST00000135222 | ethanolamine kinase 2                                                                                                                | -3.45 | 2.67E-06 | 4.87E-04 | 4.77  |
| <i>Ewsr1</i>     | ENSMUST00000102930 | Ewing sarcoma breakpoint region 1                                                                                                    | 6.58  | 2.66E-10 | 7.51E-07 | 13.20 |
| <i>Fam195a</i>   | ENSMUST00000026828 | family with sequence similarity 195, member A                                                                                        | -3.27 | 1.92E-06 | 4.31E-04 | 5.09  |
| <i>Fam20b</i>    | ENSMUST00000122424 | family with sequence similarity 20, member B                                                                                         | -2.73 | 5.53E-06 | 6.51E-04 | 4.08  |
| <i>Fars2</i>     | ENSMUST00000021857 | phenylalanine-tRNA synthetase 2 (mitochondrial)                                                                                      | 3.34  | 4.90E-06 | 6.29E-04 | 4.20  |
| <i>Farsa</i>     | ENSMUST00000003906 | phenylalanyl-tRNA synthetase, alpha subunit                                                                                          | -2.16 | 6.02E-06 | 6.78E-04 | 4.00  |
| <i>Foxk2</i>     | ENSMUST00000106113 | forkhead box K2                                                                                                                      | 2.91  | 6.77E-06 | 7.21E-04 | 3.90  |
| <i>Foxo1</i>     | ENSMUST00000053764 | forkhead box O1                                                                                                                      | -2.75 | 1.11E-05 | 1.01E-03 | 3.42  |
| <i>Hadhb</i>     | ENSMUST00000026841 | hydroxyacyl-Coenzyme A dehydrogenase/3-ketoacyl-Coenzyme A thiolase/enoyl-Coenzyme A hydratase (trifunctional protein), beta subunit | 2.30  | 1.44E-05 | 1.16E-03 | 3.17  |
| <i>Hao1</i>      | ENSMUST00000028704 | hydroxyacid oxidase 1, liver                                                                                                         | 3.88  | 1.30E-06 | 3.51E-04 | 5.45  |
| <i>Hif1an</i>    | ENSMUST00000040455 | hypoxia-inducible factor 1, alpha subunit inhibitor                                                                                  | -2.85 | 3.14E-06 | 5.03E-04 | 4.62  |
| <i>Hmgn1</i>     | ENSMUST00000050884 | high mobility group nucleosomal binding domain 1                                                                                     | 3.11  | 1.66E-05 | 1.31E-03 | 3.05  |
| <i>Hnrnpa2b1</i> | ENSMUST00000114459 | heterogeneous nuclear ribonucleoprotein A2/B1                                                                                        | 2.27  | 8.14E-06 | 8.39E-04 | 3.71  |
| <i>Irf6</i>      | ENSMUST00000076521 | interferon regulatory factor 6                                                                                                       | 2.49  | 3.84E-06 | 5.29E-04 | 4.42  |
| <i>Ldlr</i>      | ENSMUST00000034713 | low density lipoprotein receptor                                                                                                     | -3.46 | 1.75E-06 | 4.25E-04 | 5.18  |
| <i>Lipa</i>      | ENSMUST00000049572 | lysosomal acid lipase A                                                                                                              | 4.30  | 3.14E-07 | 1.18E-04 | 6.77  |
| <i>Man2c1</i>    | ENSMUST00000160147 | mannosidase, alpha, class 2C, member 1                                                                                               | 5.10  | 7.62E-09 | 8.60E-06 | 10.19 |
| <i>Maob</i>      | ENSMUST00000040820 | monoamine oxidase B                                                                                                                  | 3.70  | 8.80E-08 | 4.97E-05 | 7.98  |
| <i>Mapk1ip1l</i> | ENSMUST00000166743 | mitogen-activated protein kinase 1 interacting protein 1-like                                                                        | -3.18 | 5.71E-06 | 6.58E-04 | 4.05  |
| <i>Mfsd7c</i>    | ENSMUST00000040461 | major facilitator superfamily domain containing 7C                                                                                   | -3.95 | 1.32E-05 | 1.09E-03 | 3.25  |
| <i>Mon1a</i>     | ENSMUST00000035202 | MON1 homolog A (yeast)                                                                                                               | 3.65  | 9.75E-06 | 9.59E-04 | 3.55  |
| <i>Mxd4</i>      | ENSMUST00000042701 | Max dimerization protein 4                                                                                                           | 3.55  | 1.31E-06 | 3.51E-04 | 5.44  |
| <i>Myl6</i>      | ENSMUST00000164181 | myosin, light                                                                                                                        | 2.69  | 2.30E-06 | 4.81E-04 | 4.92  |

|                 |                    |                                                               |       |          |          |       |
|-----------------|--------------------|---------------------------------------------------------------|-------|----------|----------|-------|
|                 |                    | polypeptide 6, alkali, smooth muscle and non-muscle           |       |          |          |       |
| <i>Nap1l1</i>   | ENSMUST00000171797 | nucleosome assembly protein 1-like 1                          | 3.70  | 2.90E-06 | 5.03E-04 | 4.69  |
| <i>Osgin1</i>   | ENSMUST00000152420 | oxidative stress induced growth inhibitor 1                   | 4.25  | 9.21E-06 | 9.29E-04 | 3.61  |
| <i>Paip2</i>    | ENSMUST00000041314 | polyadenylate-binding protein-interacting protein 2           | 2.62  | 1.68E-05 | 1.31E-03 | 3.05  |
| <i>Parva</i>    | ENSMUST00000106643 | parvin, alpha                                                 | 4.23  | 1.39E-08 | 1.12E-05 | 9.64  |
| <i>Pdzd8</i>    | ENSMUST00000099274 | PDZ domain containing 8                                       | -3.13 | 5.32E-06 | 6.48E-04 | 4.12  |
| <i>Pgp</i>      | ENSMUST00000053024 | phosphoglycolate phosphatase                                  | -3.15 | 1.22E-05 | 1.06E-03 | 3.33  |
| <i>Pigg</i>     | ENSMUST00000119014 | phosphatidylinositol glycan anchor biosynthesis, class G      | -2.60 | 6.53E-06 | 7.09E-04 | 3.92  |
| <i>Pld3</i>     | ENSMUST00000117095 | phospholipase D family, member 3                              | -4.67 | 1.55E-07 | 7.31E-05 | 7.48  |
| <i>Pnpla2</i>   | ENSMUST00000164016 | patatin-like phospholipase domain containing 2                | -3.54 | 3.46E-06 | 5.03E-04 | 4.53  |
| <i>Pofut1</i>   | ENSMUST00000049863 | protein O-fucosyltransferase 1                                | -2.85 | 5.39E-06 | 6.48E-04 | 4.11  |
| <i>Pptc7</i>    | ENSMUST00000053426 | PTC7 protein phosphatase homolog ( <i>S. cerevisiae</i> )     | -3.35 | 2.50E-06 | 4.86E-04 | 4.84  |
| <i>Rbm48</i>    | ENSMUST00000042753 | RNA binding motif protein 48                                  | 2.24  | 1.08E-05 | 1.00E-03 | 3.46  |
| <i>Rbp4</i>     | ENSMUST00000025951 | retinol binding protein 4, plasma                             | 4.77  | 8.04E-10 | 1.51E-06 | 12.41 |
| <i>Reep4</i>    | ENSMUST00000047218 | receptor accessory protein 4                                  | -4.78 | 9.92E-08 | 5.09E-05 | 7.90  |
| <i>Rgn</i>      | ENSMUST00000023832 | regucalcin                                                    | 5.23  | 1.33E-05 | 1.09E-03 | 3.26  |
| <i>Rnf8</i>     | ENSMUST00000024817 | ring finger protein 8                                         | 3.51  | 2.43E-06 | 4.86E-04 | 4.86  |
| <i>Sat1</i>     | ENSMUST00000112551 | spermidine/spermine N1-acetyl transferase 1                   | 4.74  | 3.48E-06 | 5.03E-04 | 4.52  |
| <i>Secisbp2</i> | ENSMUST00000040117 | SECIS binding protein 2                                       | -2.53 | 9.75E-07 | 3.06E-04 | 5.74  |
| <i>Sgk2</i>     | ENSMUST00000018012 | serum/glucocorticoid regulated kinase 2                       | -4.02 | 6.89E-07 | 2.29E-04 | 6.07  |
| <i>Slc43a1</i>  | ENSMUST00000028469 | solute carrier family 43, member 1                            | -3.76 | 5.11E-06 | 6.41E-04 | 4.16  |
| <i>Slc9a1</i>   | ENSMUST00000030669 | solute carrier family 9 (sodium/hydrogen exchanger), member 1 | -3.19 | 1.42E-06 | 3.63E-04 | 5.38  |
| <i>Slco1b2</i>  | ENSMUST00000042812 | solute carrier organic anion transporter family, member 1b2   | 4.96  | 1.91E-08 | 1.35E-05 | 9.44  |
| <i>Snrnp27</i>  | ENSMUST00000113683 | small nuclear ribonucleoprotein 27 (U4/U6.U5)                 | 2.22  | 1.87E-05 | 1.41E-03 | 2.94  |
| <i>Steap3</i>   | ENSMUST00000112643 | STEAP family member 3                                         | -3.01 | 1.23E-05 | 1.06E-03 | 3.32  |
| <i>Sugt1</i>    | ENSMUST00000054908 | SGT1, suppressor of G2 allele of SKP1 ( <i>S.</i>             | 2.38  | 1.06E-05 | 1.00E-03 | 3.47  |

|                |                     |                                                                       |       |          |          |      |
|----------------|---------------------|-----------------------------------------------------------------------|-------|----------|----------|------|
|                |                     | cerevisiae)                                                           |       |          |          |      |
| <i>Tat</i>     | ENSMUST00000001720  | tyrosine<br>aminotransferase                                          | -3.60 | 3.33E-06 | 5.03E-04 | 4.56 |
| <i>Terf1</i>   | ENSMUST000000188371 | telomeric repeat<br>binding factor 1                                  | 2.97  | 6.84E-07 | 2.29E-04 | 6.04 |
| <i>Thap1</i>   | ENSMUST00000036807  | THAP domain<br>containing, apoptosis<br>associated protein 1          | -2.41 | 6.13E-06 | 6.78E-04 | 3.99 |
| <i>Tmem131</i> | ENSMUST00000027290  | transmembrane protein<br>131                                          | -4.20 | 9.86E-06 | 9.59E-04 | 3.53 |
| <i>Tpral</i>   | ENSMUST00000055022  | transmembrane<br>protein, adipocyte<br>associated 1                   | -2.75 | 4.72E-06 | 6.20E-04 | 4.23 |
| <i>Wipf2</i>   | ENSMUST00000037480  | WAS/WASL<br>interacting protein<br>family, member 2                   | -3.22 | 1.01E-05 | 9.63E-04 | 3.52 |
| <i>Wnk1</i>    | ENSMUST00000088644  | WNK lysine deficient<br>protein kinase 1                              | -3.06 | 3.20E-06 | 5.03E-04 | 4.60 |
| <i>Zak</i>     | ENSMUST00000090824  | sterile alpha motif and<br>leucine zipper<br>containing kinase<br>AZK | -2.80 | 3.73E-06 | 5.26E-04 | 4.46 |
| <i>Zdhhc17</i> | ENSMUST00000041723  | zinc finger, DHHC<br>domain containing 17                             | 2.34  | 3.22E-06 | 5.03E-04 | 4.59 |

**Supplemental Table 4. Enrichment of biological process (BP) Gene Ontology (GO) terms for genes differentially expressed in the Brandt's bat liver compared to other mammals.**

| <b>GO Category</b> | <b>Term</b>                       | <b>Count</b> | <b>Genes</b>                                         | <b>Fold Enrichment</b> | <b>Fisher's exact P-value</b> |
|--------------------|-----------------------------------|--------------|------------------------------------------------------|------------------------|-------------------------------|
| GO:0006432         | phenylalanyl-tRNA aminoacylation  | 2            | <i>Fars2, Farsa</i>                                  | 115.2                  | 1.10E-04                      |
| GO:0046486         | glycerolipid metabolic process    | 4            | <i>Agpat6, Pigg, Pnpla2, Etnk2</i>                   | 7.1                    | 2.40E-03                      |
| GO:0016042         | lipid catabolic process           | 4            | <i>Pld3, Lipa, Pnpla2, Hadhb</i>                     | 6.9                    | 2.70E-03                      |
| GO:0045017         | glycerolipid biosynthetic process | 3            | <i>Aagat6, Pigg, Etnk2</i>                           | 11.9                   | 2.00E-03                      |
| GO:0009725         | response to hormone stimulus      | 4            | <i>Rbp4, Adh1, Foxo1, Tat</i>                        | 5.6                    | 5.70E-03                      |
| GO:0042157         | lipoprotein metabolic process     | 3            | <i>Zdhhc17, Ldlr, Pigg</i>                           | 9.1                    | 4.40E-03                      |
| GO:0042572         | retinol metabolic process         | 2            | <i>Rbp4, Adh1</i>                                    | 46.1                   | 8.20E-04                      |
| GO:0009719         | response to endogenous stimulus   | 4            | <i>Rbp4, Adh1, Foxo1, Tat</i>                        | 5.0                    | 8.30E-03                      |
| GO:0008654         | phospholipid biosynthetic process | 3            | <i>Agpat6, Pigg, Etnk2</i>                           | 8.3                    | 5.60E-03                      |
| GO:0030879         | mammary gland development         | 3            | <i>Agpat6, Irf6, Creb1</i>                           | 8.0                    | 6.20E-03                      |
| GO:0010033         | response to organic substance     | 6            | <i>Rbp4, Adh1, Creb1, Foxo1, Tat, Slc9a1</i>         | 2.7                    | 2.20E-02                      |
| GO:0055114         | oxidation reduction               | 7            | <i>Hao1, Steap3, Hif1an, Adh1, Maob, Aldh2, Cbr4</i> | 2.4                    | 2.60E-02                      |
| GO:0008283         | cell proliferation                | 4            | <i>Rbp4, Lipa, Irf6, Tthap1</i>                      | 3.7                    | 2.20E-02                      |
| GO:0009306         | protein secretion                 | 2            | <i>Steap3, Mon1a</i>                                 | 20.9                   | 4.00E-03                      |
| GO:0009628         | response to abiotic stimulus      | 4            | <i>Hmgn1, Rnf8, Rbp4, Slc9a1</i>                     | 3.7                    | 2.30E-02                      |

**Supplemental Table 5. Genes differentially expressed in the naked mole rat liver compared to other mammals.**

For each gene, gene counts were normalized across all replicates. We used an absolute value of  $\log_2$  Ratio  $\geq 2$ , a Benjamini-Hochberg corrected P-value  $\leq 0.05$ , and a B-value of at least 2.945 (representing a 95% probability that a gene is differentially expressed) as the threshold to judge the significance of gene expression difference between the naked mole rat and other mammals. A negative fold change denotes a higher gene expression compared to the other mammals examined, and vice versa.

| Gene symbol (mouse)   | Ensembl transcript ID | Name                                                                           | logFC | P-value  | BH-adj. P-value | B-value |
|-----------------------|-----------------------|--------------------------------------------------------------------------------|-------|----------|-----------------|---------|
| <i>Acap2</i>          | ENSMUST00000058033    | ArfGAP with coiled-coil, ankyrin repeat and PH domains 2                       | -2.20 | 1.27E-05 | 1.56E-03        | 3.30    |
| <i>Afm</i>            | ENSMUST00000113179    | afamin                                                                         | 5.43  | 1.50E-06 | 4.47E-04        | 5.29    |
| <i>Angptl3</i>        | ENSMUST00000030280    | angiopoietin-like 3                                                            | -2.97 | 4.22E-06 | 8.99E-04        | 4.35    |
| <i>Arhgap3 2</i>      | ENSMUST00000174641    | Rho GTPase activating protein 32                                               | -4.30 | 1.58E-05 | 1.78E-03        | 3.09    |
| <i>Arl3</i>           | ENSMUST00000026009    | ADP-ribosylation factor-like 3                                                 | -2.47 | 5.86E-07 | 2.54E-04        | 6.22    |
| <i>Cask</i>           | ENSMUST00000115438    | calcium/calmodulin-dependent serine protein kinase (MAGUK family)              | -2.93 | 9.89E-06 | 1.35E-03        | 3.54    |
| <i>Ccdc12</i>         | ENSMUST00000019803    | coiled-coil domain containing 12                                               | 2.73  | 5.19E-07 | 2.44E-04        | 6.29    |
| <i>Cct6a</i>          | ENSMUST00000031402    | chaperonin containing Tcp1, subunit 6a (zeta)                                  | 5.86  | 5.54E-13 | 3.13E-09        | 18.33   |
| <i>Cops5</i>          | ENSMUST00000027050    | COP9 (constitutive photomorphogenic) homolog, subunit 5 (Arabidopsis thaliana) | 2.58  | 4.30E-06 | 8.99E-04        | 4.32    |
| <i>Cox15</i>          | ENSMUST00000045562    | cytochrome c oxidase assembly protein 15                                       | 2.42  | 6.48E-06 | 1.08E-03        | 3.94    |
| <i>Crtc3</i>          | ENSMUST00000122255    | CREB regulated transcription coactivator 3                                     | -3.14 | 9.01E-06 | 1.35E-03        | 3.63    |
| <i>D930015 E06Rik</i> | ENSMUST00000052342    | RIKEN cDNA D930015E06 gene                                                     | 4.56  | 1.24E-06 | 4.15E-04        | 5.49    |
| <i>Deaf1</i>          | ENSMUST00000080553    | deformed epidermal autoregulatory factor 1 (Drosophila)                        | -3.29 | 2.08E-07 | 1.21E-04        | 7.19    |
| <i>Dmf1</i>           | ENSMUST00000071921    | cyclin D binding myb-like transcription factor 1                               | -2.29 | 9.76E-06 | 1.35E-03        | 3.55    |
| <i>Dtwd1</i>          | ENSMUST00000170908    | DTW domain containing 1                                                        | -3.15 | 5.73E-06 | 1.07E-03        | 4.06    |



|                  |                    |                                                                                          |       |          |          |       |
|------------------|--------------------|------------------------------------------------------------------------------------------|-------|----------|----------|-------|
| <i>Fam168b</i>   | ENSMUST00000167518 | family with sequence similarity 168, member B                                            | -3.26 | 2.15E-07 | 1.21E-04 | 7.17  |
| <i>Fto</i>       | ENSMUST00000069718 | fat mass and obesity associated                                                          | 3.35  | 1.01E-05 | 1.35E-03 | 3.53  |
| <i>Gabpb1</i>    | ENSMUST00000110425 | GA repeat binding protein, beta 1                                                        | -2.62 | 3.24E-08 | 3.66E-05 | 8.92  |
| <i>Hgsnat</i>    | ENSMUST00000037609 | heparan-alpha-glucosaminide N-acetyltransferase                                          | 3.18  | 1.25E-06 | 4.15E-04 | 5.47  |
| <i>Hpcal1</i>    | ENSMUST00000071858 | hippocalcin-like 1                                                                       | -3.41 | 1.68E-07 | 1.21E-04 | 7.40  |
| <i>Llph</i>      | ENSMUST00000020444 | LLP homolog, long-term synaptic facilitation (Aplysia)                                   | -3.46 | 3.23E-08 | 3.66E-05 | 8.94  |
| <i>Mef2d</i>     | ENSMUST00000107559 | myocyte enhancer factor 2D                                                               | 3.21  | 1.12E-06 | 4.15E-04 | 5.58  |
| <i>Mex3c</i>     | ENSMUST00000091852 | mex3 homolog C (C. elegans)                                                              | 3.13  | 2.56E-06 | 6.57E-04 | 4.81  |
| <i>Minos1</i>    | ENSMUST00000143971 | mitochondrial inner membrane organizing system 1                                         | 2.46  | 1.78E-05 | 1.89E-03 | 2.99  |
| <i>N6amt2</i>    | ENSMUST00000022518 | N-6 adenine-specific DNA methyltransferase 2 (putative)                                  | -3.60 | 4.89E-06 | 9.87E-04 | 4.21  |
| <i>Pced1a</i>    | ENSMUST00000089581 | PC-esterase domain containing 1A                                                         | 3.87  | 1.37E-06 | 4.30E-04 | 5.39  |
| <i>Pin4</i>      | ENSMUST00000113627 | protein (peptidyl-prolyl cis/trans isomerase) NIMA-interacting, 4 (parvulin)             | -2.01 | 1.00E-05 | 1.35E-03 | 3.52  |
| <i>Pms1</i>      | ENSMUST00000027267 | postmeiotic segregation increased 1 (S. cerevisiae)                                      | -3.22 | 8.54E-06 | 1.35E-03 | 3.68  |
| <i>Polr3f</i>    | ENSMUST00000028914 | polymerase (RNA) III (DNA directed) polypeptide F                                        | -2.61 | 1.60E-06 | 4.52E-04 | 5.25  |
| <i>Prkab1</i>    | ENSMUST00000031486 | protein kinase, AMP-activated, beta 1 non-catalytic subunit                              | -2.65 | 1.51E-05 | 1.76E-03 | 3.13  |
| <i>Proc</i>      | ENSMUST00000171765 | protein C                                                                                | 2.77  | 4.74E-07 | 2.43E-04 | 6.42  |
| <i>Psmb8</i>     | ENSMUST00000025196 | proteasome (prosome, macropain) subunit, beta type 8 (large multifunctional peptidase 7) | 4.51  | 7.28E-09 | 2.05E-05 | 10.21 |
| <i>Rad17</i>     | ENSMUST00000022136 | RAD17 homolog (S. pombe)                                                                 | -2.67 | 2.21E-06 | 5.93E-04 | 4.96  |
| <i>Rnf144b</i>   | ENSMUST00000068891 | ring finger protein 144B                                                                 | -2.13 | 1.44E-05 | 1.73E-03 | 3.19  |
| <i>Rnf2</i>      | ENSMUST00000187048 | ring finger protein 2                                                                    | -2.75 | 6.27E-06 | 1.07E-03 | 3.97  |
| <i>Rpf2</i>      | ENSMUST00000183309 | ribosome production factor 2 homolog (S. cerevisiae)                                     | -2.90 | 4.40E-08 | 4.14E-05 | 8.65  |
| <i>Rufy1</i>     | ENSMUST00000020643 | RUN and FYVE domain containing 1                                                         | -3.24 | 1.09E-08 | 2.05E-05 | 9.95  |
| <i>Secisbp2l</i> | ENSMUST00000053699 | SECIS binding protein 2-like                                                             | -3.48 | 1.23E-06 | 4.15E-04 | 5.52  |

|                 |                    |                                               |       |          |          |      |
|-----------------|--------------------|-----------------------------------------------|-------|----------|----------|------|
| <i>Setd3</i>    | ENSMUST00000071095 | SET domain containing 3                       | 3.71  | 1.03E-05 | 1.36E-03 | 3.50 |
| <i>Slc25a30</i> | ENSMUST00000022580 | solute carrier family 25, member 30           | 3.14  | 8.99E-06 | 1.35E-03 | 3.63 |
| <i>Smc3</i>     | ENSMUST00000025930 | structural maintenance of chromosomes 3       | -2.64 | 1.09E-05 | 1.40E-03 | 3.44 |
| <i>Sox13</i>    | ENSMUST00000153799 | SRY (sex determining region Y)-box 13         | -3.25 | 4.09E-06 | 8.99E-04 | 4.38 |
| <i>Spice1</i>   | ENSMUST00000050897 | spindle and centriole associated protein 1    | -3.31 | 1.77E-05 | 1.89E-03 | 2.98 |
| <i>Ss18</i>     | ENSMUST00000040924 | synovial sarcoma translocation, Chromosome 18 | -2.82 | 1.53E-05 | 1.76E-03 | 3.12 |
| <i>Ssr3</i>     | ENSMUST00000029414 | signal sequence receptor, gamma               | 2.87  | 1.87E-05 | 1.89E-03 | 2.95 |
| <i>Stx4a</i>    | ENSMUST00000033075 | syntaxin 4A (placental)                       | -2.13 | 4.24E-06 | 8.99E-04 | 4.34 |
| <i>Tk2</i>      | ENSMUST00000050211 | thymidine kinase 2, mitochondrial             | -3.00 | 6.04E-06 | 1.07E-03 | 4.01 |
| <i>Uox</i>      | ENSMUST00000029837 | urate oxidase                                 | 7.81  | 6.07E-06 | 1.07E-03 | 4.00 |
| <i>Vamp4</i>    | ENSMUST00000132158 | vesicle-associated membrane protein 4         | -3.18 | 2.92E-06 | 7.17E-04 | 4.69 |
| <i>Zfp292</i>   | ENSMUST00000047950 | zinc finger protein 292                       | -6.12 | 1.74E-07 | 1.21E-04 | 7.37 |

**Supplemental Table 6. Enrichment of biological process (BP) Gene Ontology (GO) terms for genes differentially expressed in the naked mole rat liver compared to other mammals.**

| GO Category | Term                  | Count | Genes                                 | Fold Enrichment | Fisher's exact P-value |
|-------------|-----------------------|-------|---------------------------------------|-----------------|------------------------|
| GO:0007049  | cell cycle            | 5     | <i>DMTF1, RNF2, SMC3, RAD17, ARL3</i> | 3.3             | 1.70E-02               |
| GO:0006259  | DNA metabolic process | 4     | <i>TK2, SMC3, RAD17, PMS1</i>         | 3.8             | 2.00E-02               |

**Supplemental Table 7. Overview of species examined in the unique amino acid change analysis.**

| Common name         | Binomial name                 |
|---------------------|-------------------------------|
| aardvark            | <i>Orycteropus afer afer</i>  |
| African elephant    | <i>Loxodonta africana</i>     |
| alpaca              | <i>Vicugna pacos</i>          |
| armadillo           | <i>Dasypus novemcinctus</i>   |
| baboon              | <i>Papio hamadryas</i>        |
| Bactrian camel      | <i>Camelus ferus</i>          |
| big brown bat       | <i>Eptesicus fuscus</i>       |
| black flying-fox    | <i>Pteropus alecto</i>        |
| bottlenose dolphin  | <i>Tursiops truncatus</i>     |
| bowhead whale       | <i>Balaena mysticetus</i>     |
| brush-tailed rat    | <i>Octodon degus</i>          |
| bushbaby            | <i>Otolemur garnettii</i>     |
| cape elephant shrew | <i>Elephantulus edwardii</i>  |
| cape golden mole    | <i>Chrysochloris asiatica</i> |
| cat                 | <i>Felis catus</i>            |
| chicken             | <i>Gallus gallus</i>          |
| chimpanzee          | <i>Pan troglodytes</i>        |
| chinchilla          | <i>Chinchilla lanigera</i>    |
| Chinese hamster     | <i>Cricetulus griseus</i>     |
| Chinese tree shrew  | <i>Tupaia chinensis</i>       |
| (common) shrew      | <i>Sorex araneus</i>          |
| cow                 | <i>Bos taurus</i>             |
| crab-eating macaque | <i>Macaca fascicularis</i>    |
| David's Myotis bat  | <i>Myotis davidii</i>         |
| dog                 | <i>Canis lupus familiaris</i> |
| European hedgehog   | <i>Erinaceus europaeus</i>    |
| ferret              | <i>Mustela putorius furo</i>  |

|                                |                                       |
|--------------------------------|---------------------------------------|
| gibbon                         | <i>Nomascus leucogenys</i>            |
| goat                           | <i>Capra hircus</i>                   |
| golden hamster                 | <i>Mesocricetus auratus</i>           |
| gorilla                        | <i>Gorilla gorilla gorilla</i>        |
| greater flying fox             | <i>Pteropus vampyrus</i>              |
| green monkey                   | <i>Chlorocebus sabaesus</i>           |
| guinea pig                     | <i>Cavia porcellus</i>                |
| horse                          | <i>Equus caballus</i>                 |
| human                          | <i>Homo sapiens</i>                   |
| killer whale                   | <i>Orcinus orca</i>                   |
| lesser Egyptian jerboa         | <i>Jaculus jaculus</i>                |
| little brown bat               | <i>Myotis lucifugus</i>               |
| manatee                        | <i>Trichechus manatus latirostris</i> |
| marmoset                       | <i>Callithrix jacchus</i>             |
| minke whale                    | <i>Balaenoptera acutorostrata</i>     |
| mouse                          | <i>Mus musculus</i>                   |
| naked mole rat                 | <i>Heterocephalus glaber</i>          |
| opossum                        | <i>Monodelphis domestica</i>          |
| orangutan                      | <i>Pongo pygmaeus abelii</i>          |
| Pacific walrus                 | <i>Odobenus rosmarus divergens</i>    |
| panda                          | <i>Ailuropoda melanoleuca</i>         |
| pig                            | <i>Sus scrofa</i>                     |
| pika                           | <i>Ochotona princeps</i>              |
| platypus                       | <i>Ornithorhynchus anatinus</i>       |
| prairie vole                   | <i>Microtus ochrogaster</i>           |
| rabbit                         | <i>Oryctolagus cuniculus</i>          |
| rat                            | <i>Rattus norvegicus</i>              |
| rhesus macaque                 | <i>Macaca mulatta</i>                 |
| sheep                          | <i>Ovis aries</i>                     |
| sperm whale                    | <i>Physeter catodon</i>               |
| squirrel monkey                | <i>Saimiri boliviensis</i>            |
| star-nosed mole                | <i>Condylura cristata</i>             |
| Tasmanian devil                | <i>Sarcophilus harrisii</i>           |
| tenrec                         | <i>Echinops telfairi</i>              |
| thirteen-lined ground squirrel | <i>Spermophilus tridecemlineatus</i>  |
| Tibetan antelope               | <i>Pantholops hodgsonii</i>           |
| wallaby                        | <i>Macropus eugenii</i>               |
| Weddell seal                   | <i>Leptonychotes weddellii</i>        |
| Western clawed frog            | <i>Xenopus tropicalis</i>             |
| white rhinoceros               | <i>Ceratotherium simum</i>            |
| Yangtze River dolphin          | <i>Lipotes vexillifer</i>             |
